# Supplementary material for: Glassy GaS: transparent and unusually rigid thin films for visible to mid-IR memory applications
Source: Royal Society of Chemistry journal article supplement (doi:10.1039/d0cp04697c), 2020-01-01
Supplement: d0cp04697c1.pdf [file d0cp04697c1.pdf]

# Glassy GaS: transparent and unusually rigid thin films for visible to mid-IR memory applications

Andrey Tverjanovich,<sup>a</sup> Maxim Khomenko,<sup>b</sup> Sergei Bereznev,<sup>c</sup> Daniele Fontanari,<sup>d</sup> Anton Sokolov,<sup>b,d</sup> Takeshi Usuki,<sup>e</sup> Koji Ohara,<sup>f</sup> David Le Coq,<sup>g</sup> Pascal Masselin,<sup>d</sup> and Eugene Bychkov<sup>b,d\*</sup>

<sup>a</sup> Institute of Chemistry, St. Petersburg State University, 198504 St. Petersburg, Russia

<sup>b</sup> ILIT RAS – Branch of the FSRC ‘Crystallography and Photonics’ RAS, 140700 Shatura, Moscow Region, Russia

<sup>c</sup> Department of Materials and Environmental Technology, Tallinn University of Technology, 19086 Tallinn, Estonia

<sup>d</sup> Laboratoire de Physico-Chimie de l’Atmosphère, Université du Littoral Côte d’Opale, 59140 Dunkerque, France

<sup>e</sup> Faculty of Science, Yamagata University, Yamagata 990-8560, Japan

<sup>f</sup> Diffraction and Scattering Division, Japan Synchrotron Radiation Research Institute, Sayo-gun, Hyogo 679-5198, Japan

<sup>g</sup> Institut des Sciences Chimiques de Rennes, Université Rennes, 35000 Rennes, France

## Electronic Supplementary Information

**Fig. S1.** High-energy X-ray diffraction measurements at SPring-8 (Hyogo Prefecture, Japan).

**Fig. S2.** Experimental and simulated FPMD/PBESol X-ray pair-distribution functions  $g_X(r)$  of glassy GaS.

**Fig. S3.** Mean-square displacements  $\langle r^2(t) \rangle$  of Ga and S species as a function of FPMD time  $t$  and temperature  $T$ .

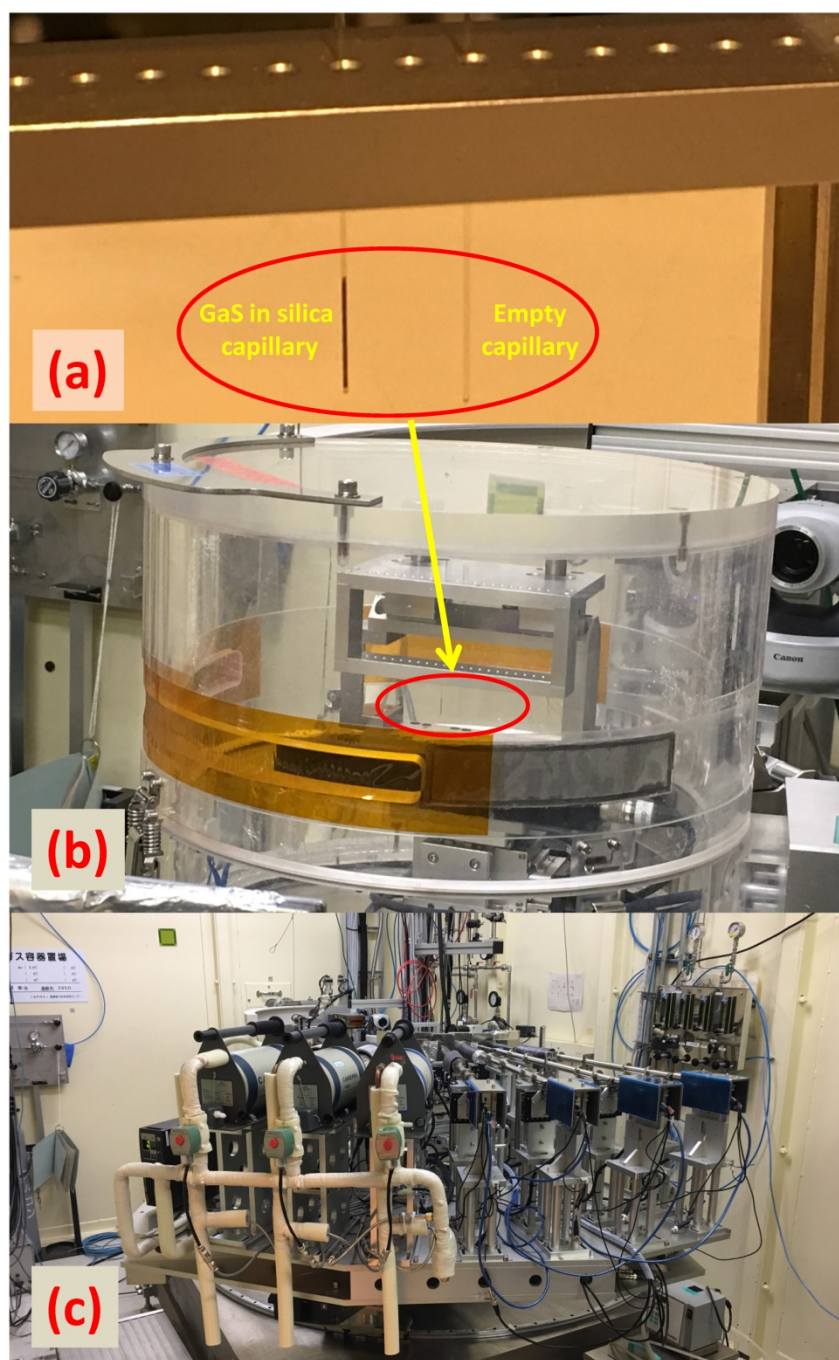

**Fig. S1.** High-energy X-ray diffraction measurements at SPring-8 (Hyogo Prefecture, Japan): (a) glassy GaS in thin-walled silica capillary and empty capillary for background subtraction, (b) a vacuum chamber of the dedicated two-axis BL04B2 diffractometer, (c) a 7-detector setup of BL04B2 including four cadmium telluride detectors at low angles and three Ge diodes at high diffraction angles.

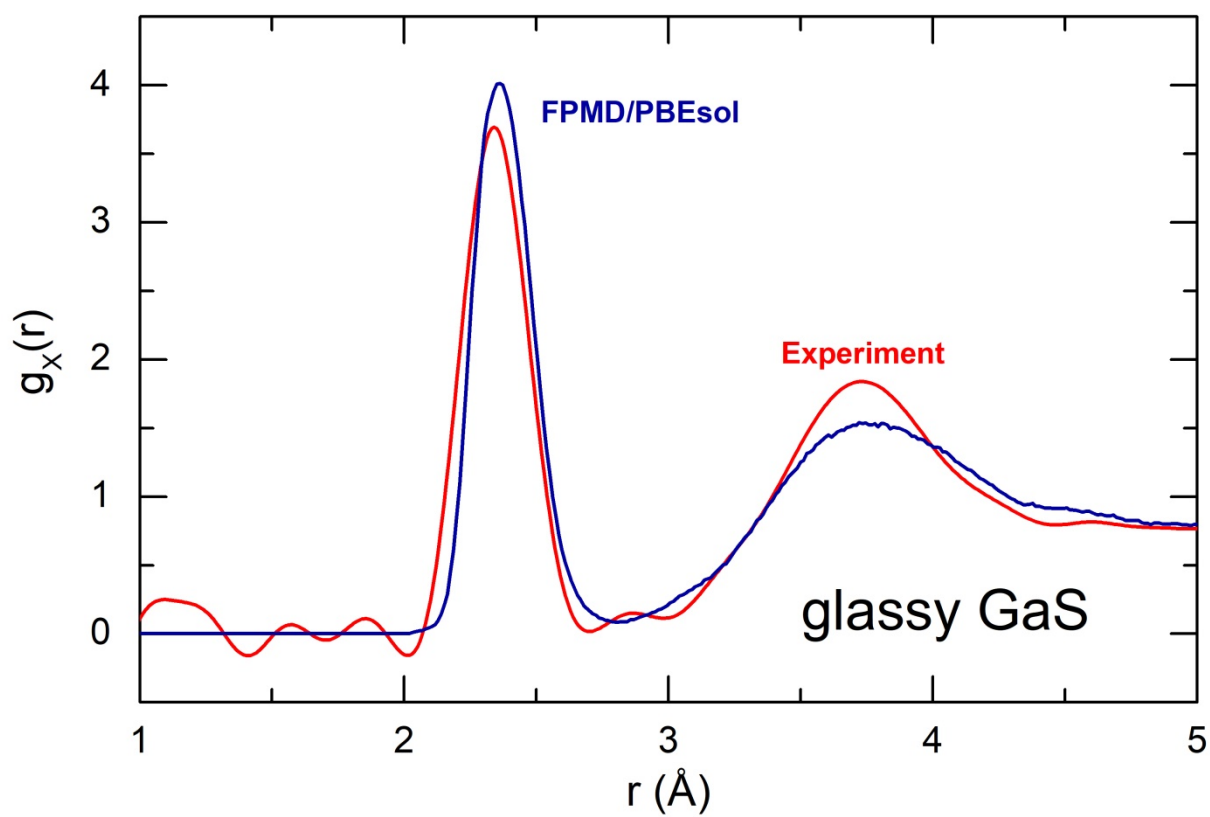

**Fig. S2.** Experimental (red) and simulated FPMD/PBEsol (blue) X-ray pair-distribution functions  $g_X(r)$  of glassy GaS. A typical problem of FPMD simulations using the general gradient approximation with classical PBEsol exchange-correlation functional resides in overestimation of the nearest neighbor interatomic distances resulting in a higher- $r$  shift of the NN peak.

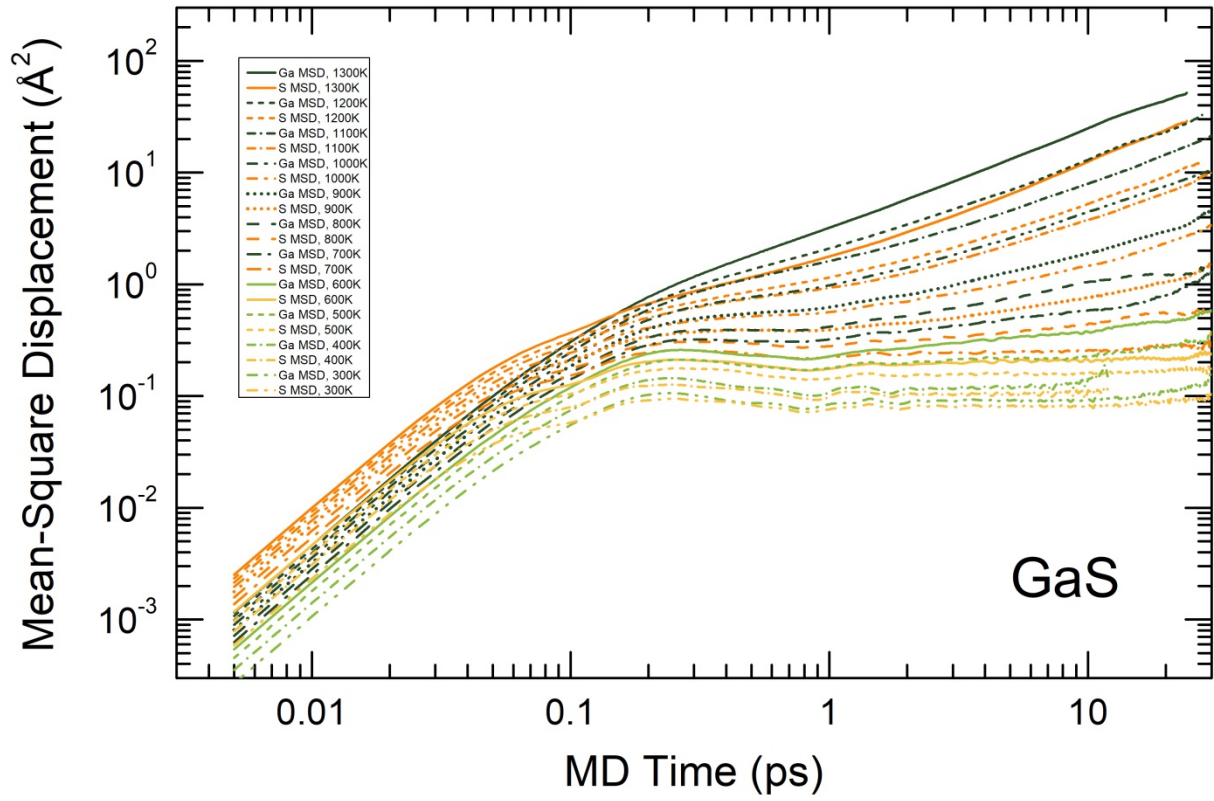

**Fig. S3.** Mean-square displacements  $\langle r^2(t) \rangle$  of Ga and S species as a function of FPMD time  $t$  and temperature  $T$ . Three characteristic regimes are clearly seen: (1) the ballistic regime below  $t \lesssim 30$  fs,  $\langle r^2(t) \rangle \propto t^2$ , (2) the intermediate regime related to vibrations and local diffusion,  $\langle r^2(t) \rangle \propto t^s$ , where  $0 \leq s < 1$ , and (3) the long-range diffusion motion at high  $T$  and  $t$ ,  $\langle r^2(t) \rangle \propto t^1$ .
